# Supplementary material
Source: PubMed Central journal article supplement (PMC5710173)
Supplement: jamacardiol-2-959-s001.pdf [file jamacardiol-2-959-s001.pdf]

## Supplementary Online Content

Cannon CP, Khan I, Klimchak AC, Reynolds MR, Sanchez RJ, Sasiela WJ. Simulation of lipid-lowering therapy intensification in a population with atherosclerotic cardiovascular disease. *JAMA Cardiol*. Published online August 2, 2017. doi:10.1001/jamacardio.2017.2289

**eTable 1.** Diagnosis and Procedure Codes for Identification of ASCVD in the Database

**eTable 2.** Mean and SD of Percentage Reduction in LDL-C Levels From Statins and Ezetimibe

**eTable 3.** List of Comorbidities for Scenarios Modeling the American College of Cardiology Expert Consensus Decision Pathway Recommendations

**eTable 4.** Comparison of Baseline Characteristics for the Simulation Cohort With ASCVD Populations From the NHANES Database and PINNACLE Registry

**eTable 5.** Estimated 95% CIs for the Proportion of ASCVD Patients Receiving Add-on PCSK9 Inhibitors in the Simulation for the Base Case

**eTable 6.** Distribution of LDL-C Levels Before and After Treatment Intensification in Base-Case Scenario A

**eTable 7.** Use of LLTs With Full Treatment Intensification Across All Scenarios

**eTable 8.** Achieved LDL-C Levels for the Base Case Compared With Scenarios Representing Treatment With Only Alirocumab, 150 mg, or Evolocumab

**eFigure 1.** Determination of Treatment Status as of the Index Date

**eFigure 2.** Flowchart of the Cohort Selection for the Study

**eFigure 3.** LLT Use and LDL-C Level Distribution After Treatment Intensification With an LDL-C Threshold of <55 mg/dL Compared With <70 mg/dL

**eMethods.** Estimation of Sampling Weights for Bootstrap Sampling

This supplementary material has been provided by the authors to give readers additional information about their work.

eTable 1. Diagnosis and Procedure Codes for Identification of ASCVD in the Database

| <b>Subgroup</b>                        | <b>Diagnosis/<br/>Procedure</b>                             | <b>Code<br/>Type</b> | <b>Code<br/>Value<sup>a</sup></b> | <b>Code Description</b>                                                      |
|----------------------------------------|-------------------------------------------------------------|----------------------|-----------------------------------|------------------------------------------------------------------------------|
| Recent ACS                             | Acute MI                                                    | ICD-9-<br>CM         | 410.x                             | Acute MI                                                                     |
|                                        | Unstable angina                                             | ICD-9-<br>CM         | 411.1                             | Intermediate coronary syndrome                                               |
|                                        |                                                             | ICD-9-<br>CM         | 411.81                            | Acute coronary occlusion without MI                                          |
| Other CHD                              | Acute MI                                                    | ICD-9-<br>CM         | 410.x                             | Acute MI                                                                     |
|                                        | Unstable angina                                             | ICD-9-<br>CM         | 411.1                             | Intermediate coronary syndrome                                               |
|                                        |                                                             | ICD-9-<br>CM         | 411.81                            | Acute coronary occlusion without MI                                          |
|                                        | Old MI                                                      | ICD-9-<br>CM         | 412                               | Old MI                                                                       |
|                                        | Stable angina                                               | ICD-9-<br>CM         | 413.x                             | Angina pectoris                                                              |
|                                        | Other chronic<br>ischemic heart<br>disease                  | ICD-9-<br>CM         | 414.x                             | Other forms of chronic ischemic heart disease                                |
|                                        | Coronary<br>revascularization<br>procedures                 | CPT                  | 33510-<br>529<br>33531-6          | Coronary artery bypass                                                       |
|                                        |                                                             | HCPCS                | S2205-<br>S2209                   | Minimally invasive direct coronary artery bypass<br>surgery                  |
|                                        |                                                             | ICD-9-<br>CM         | 36.0x                             | Removal of coronary artery obstruction and<br>insertion of stent(s)          |
|                                        |                                                             | ICD-9-<br>CM         | 36.1x                             | Bypass anastomosis for heart revascularization                               |
|                                        |                                                             | ICD-9-<br>CM         | 36.2                              | Heart revascularization by arterial implant                                  |
|                                        |                                                             | ICD-9-<br>CM         | 36.3x                             | Other heart revascularization                                                |
|                                        |                                                             | CPT                  | 92982<br>92984                    | Percutaneous transluminal coronary balloon<br>angioplasty                    |
|                                        |                                                             | CPT                  | 92995<br>92996                    | Percutaneous transluminal coronary atherectomy                               |
|                                        |                                                             | CPT                  | 92980<br>92981                    | Transcatheter placement of an intracoronary<br>stent(s)                      |
|                                        |                                                             | HCPCS                | G0290<br>G0291                    | Transcatheter placement of a drug-eluting<br>intracoronary stent(s)          |
|                                        |                                                             | ICD-9-<br>CM         | 00.66                             | Percutaneous transluminal coronary angioplasty<br>or coronary atherectomy    |
| Ischemic<br>cerebrovascular<br>disease | Ischemic stroke                                             | ICD-9-<br>CM         | 433.x1                            | Occlusion and stenosis of precerebral arteries –<br>with cerebral infarction |
|                                        |                                                             | ICD-9-<br>CM         | 434.x1                            | Occlusion of cerebral arteries – with cerebral<br>infarction                 |
|                                        | Asymptomatic<br>evidence of<br>cerebrovascular<br>occlusion | ICD-9-<br>CM         | 433.00                            | Occlusion and stenosis of basilar artery without<br>cerebral infarction      |

|     |                        |          |              |                                                                                                   |
|-----|------------------------|----------|--------------|---------------------------------------------------------------------------------------------------|
|     |                        | ICD-9-CM | 433.10       | Occlusion and stenosis of carotid artery without cerebral infarction                              |
|     |                        | ICD-9-CM | 433.20       | Occlusion and stenosis of vertebral artery without cerebral infarction                            |
|     |                        | ICD-9-CM | 433.30       | Occlusion and stenosis of multiple and bilateral precerebral arteries without cerebral infarction |
|     |                        | ICD-9-CM | 433.80       | Occlusion and stenosis of other specified precerebral artery without cerebral infarction          |
|     |                        | ICD-9-CM | 433.90       | Occlusion and stenosis of unspecified precerebral artery without cerebral infarction              |
|     | Carotid artery disease | ICD-9-CM | 00.63        | Percutaneous insertion of carotid artery stent(s)                                                 |
|     |                        | ICD-9-CM | 38.13, 38.18 | Endarterectomy of upper limb vessels/lower limb arteries                                          |
|     |                        | CPT      | 37215, 37216 | Stenting of carotid artery                                                                        |
|     |                        | CPT      | 35301        | Endarterectomy                                                                                    |
| PAD | PVD                    | ICD-9-CM | 443.9        | Peripheral vascular disease, unspecified                                                          |
|     |                        | ICD-9-CM | 00.55        | Insertion of drug-eluting peripheral vessel stent(s)                                              |
|     |                        | ICD-9-CM | 39.90        | Insertion of non-drug-eluting peripheral vessel stent(s)                                          |
|     |                        | ICD-9-CM | 00.61        | Percutaneous angioplasty or atherectomy of precerebral (extracranial) vessel(s)                   |
|     |                        | ICD-9-CM | 00.64        | Percutaneous insertion of other precerebral (extracranial) artery stent(s)                        |
|     |                        | ICD-9-CM | 39.50        | Angioplasty or atherectomy of other noncoronary vessel(s)                                         |
|     |                        | ICD-9-CM | 39.72        | Endovascular repair or occlusion of head and neck vessels                                         |
|     |                        | ICD-9-CM | 39.74        | Endovascular removal of obstruction from head and neck vessel(s)                                  |
|     |                        | ICD-9-CM | 445.0X       | Atheroembolism of extremities                                                                     |
|     |                        | CPT      | 35450-35459  | Transluminal angioplasty: open (excluding venous)                                                 |
|     |                        | CPT      | 35470-35475  | Transluminal angioplasty: percutaneous (excluding venous)                                         |
|     |                        | CPT      | 35480-35485  | Transluminal atherectomy: cutdown                                                                 |
|     |                        | CPT      | 35490-35495  | Transluminal atherectomy: percutaneous                                                            |
|     |                        | CPT      | 35501-35571  | Arterial bypass using vein grafts                                                                 |
|     |                        | CPT      | 35583-35587  | Lower extremity revascularization: in-situ vein bypass                                            |
|     |                        | CPT      | 35601-35671  | Arterial bypass with synthetic grafts                                                             |
|     |                        | CPT      | 37205-37208  | Insertion of intravascular stent                                                                  |
|     |                        | CPT      | 93668        | Rehabilitation services: PAD                                                                      |
|     |                        | CPT      | 37220-37235  | Endovascular revascularization, lower extremities                                                 |

|  |                           |          |                 |                                                             |
|--|---------------------------|----------|-----------------|-------------------------------------------------------------|
|  | Abdominal aortic aneurysm | ICD-9-CM | 441.3<br>441.4  | Abdominal aortic aneurysm                                   |
|  |                           | CPT      | 34800-<br>34805 | Endovascular repair of infrarenal abdominal aortic aneurysm |
|  |                           | CPT      | 35081-<br>35103 | Open repair of abdominal aortic aneurysm                    |

\*Codes 410.x, 411.1, and 411.81 for recent ACS were utilized together with additional criteria defining an ACS event ≤12 months from index. If the criteria for recent ACS were not met, these codes were utilized for the other CHD category.

ACS, acute coronary syndrome; CHD, coronary heart disease; CPT, Current Procedural Terminology; HCPCS, Healthcare Common Procedure Coding System; ICD-9-CM, International Classification of Diseases, Ninth Revision, Clinical Modification; MI, myocardial infarction; PAD, peripheral arterial disease; PVD, peripheral vascular disease.

**eTable 2. Mean and SD of Percentage Reduction in LDL-C Levels From Statins and Ezetimibe**

| <b>LLT Type</b> | <b>Dose</b> | <b>Mean (Reference)<sup>a</sup></b> | <b>SD (Reference)<sup>b</sup></b> |
|-----------------|-------------|-------------------------------------|-----------------------------------|
| Atorvastatin    | 10 mg       | 35.5% <sup>3</sup>                  | 10.6% <sup>4,c</sup>              |
|                 | 20 mg       | 41.4% <sup>3</sup>                  | 13.5% <sup>4,c</sup>              |
|                 | 40 mg       | 46.2% <sup>3</sup>                  | 12.5% <sup>4,c</sup>              |
|                 | 80 mg       | 50.2% <sup>3</sup>                  | 13.8% <sup>4,c</sup>              |
| Fluvastatin     | 20 mg       | 17.0% <sup>4</sup>                  | 8.0% <sup>4</sup>                 |
|                 | 40 mg       | 23.0% <sup>4</sup>                  | 10.0% <sup>4</sup>                |
|                 | 80 mg       | 26.0% <sup>4</sup>                  | 9.0% <sup>4</sup>                 |
| Lovastatin      | 10 mg       | 21.0% <sup>5</sup>                  | 10.1% (Estimated) <sup>d</sup>    |
|                 | 20 mg       | 24.0% <sup>6</sup>                  | 11.0% <sup>6</sup>                |
|                 | 40 mg       | 30.0% <sup>6</sup>                  | 11.0% <sup>6</sup>                |
|                 | 60 mg       | 34.5% (Estimated) <sup>e</sup>      | 11.7% (Estimated) <sup>f</sup>    |
| Pravastatin     | 10 mg       | 20.0% <sup>4</sup>                  | 11.0% <sup>4</sup>                |
|                 | 20 mg       | 24.0% <sup>4</sup>                  | 11.0% <sup>4</sup>                |
|                 | 40 mg       | 30.0% <sup>4</sup>                  | 13.0% <sup>4</sup>                |
|                 | 80 mg       | 33.0% <sup>5</sup>                  | 11.2% (Estimated) <sup>d</sup>    |
| Rosuvastatin    | 5 mg        | 38.8% <sup>3</sup>                  | 13.2% (Estimated) <sup>d</sup>    |
|                 | 10 mg       | 44.1% <sup>3</sup>                  | 12.5% <sup>4,c</sup>              |
|                 | 20 mg       | 49.5% <sup>3</sup>                  | 13.3% <sup>4,c</sup>              |
|                 | 40 mg       | 54.7% <sup>3</sup>                  | 12.9% <sup>4,c</sup>              |
| Simvastatin     | 5 mg        | 23.0% <sup>5</sup>                  | 11.0% <sup>4,d</sup>              |
|                 | 10 mg       | 27.4% <sup>3</sup>                  | 13.7% <sup>4,c</sup>              |
|                 | 20 mg       | 33.0% <sup>3</sup>                  | 10.4% <sup>4,c</sup>              |
|                 | 40 mg       | 38.9% <sup>3</sup>                  | 14.0% <sup>4,c</sup>              |
|                 | 80 mg       | 45.0% <sup>3</sup>                  | 11.7% <sup>4,c</sup>              |

|                        |       |                    |                    |
|------------------------|-------|--------------------|--------------------|
| Ezetimibe <sup>f</sup> | 10 mg | 22.7% <sup>g</sup> | 16.5% <sup>h</sup> |
|------------------------|-------|--------------------|--------------------|

<sup>a</sup>Mean of % reduction in LDL-C compared with placebo. <sup>b</sup>SD of % reduction in LDL-C compared with placebo. <sup>c</sup>SD estimated as the product of mean from Nicholls 2010 and coefficient of variation from Ward 2007. <sup>d</sup>SD values were not available in literature and were estimated based on the average coefficient of variation of available data. SD values for approximately 6.6% of patients on a statin (3.6% of the overall cohort) were estimated in this manner. <sup>e</sup>Estimated based on a log-linear fit to available lovastatin data for other doses. <sup>f</sup>Represents ezetimibe's incremental LDL-C-lowering efficacy as an add-on to statins.

LDL-C, low-density lipoprotein cholesterol; LLT, lipid-lowering therapy; SD, standard deviation.

**eTable 3. List of Comorbidities for Scenarios Modeling the American College of Cardiology Expert Consensus Decision Pathway Recommendations**

| # | Comorbidity                                      |
|---|--------------------------------------------------|
| 1 | Diabetes mellitus                                |
| 2 | ASCVD event <3 months from index <sup>a</sup>    |
| 3 | ASCVD event while on statin therapy <sup>b</sup> |
| 4 | Baseline LDL-C $\geq$ 190 mg/dL <sup>c</sup>     |
| 5 | Hypertension                                     |
| 6 | CKD stage III-V or dialysis                      |

<sup>a</sup>Defined as: myocardial infarction, unstable angina with hospitalization, coronary revascularization, ischemic stroke, and CV death.

<sup>b</sup>Evidence of ASCVD event while on statin therapy limited to the 2-year baseline period before index. Concurrency of ASCVD event and statin treatment defined in a manner analogous to the methodology in eFigure 1, with the index date being replaced by the ASCVD event date. <sup>c</sup>Baseline LDL-C was back-calculated based on the sampled % LDL-C-lowering efficacy for an individual patient from the PDF as described in the methods section.

ASCVD, atherosclerotic cardiovascular disease; CKD, chronic kidney disease; CV, cardiovascular; LDL-C, low-density lipoprotein cholesterol; PDF, probability density function.

**eTable 4. Comparison of Baseline Characteristics for the Simulation Cohort With ASCVD Populations From the NHANES Database and PINNACLE Registry**

|                             | <b>NHANES 2011–2012<sup>9</sup></b><br>(N=488) | <b>PINNACLE 2008–2012<sup>10</sup></b><br>(N=1,029,633) | <b>Simulation Cohort</b><br>(N=1,000,000) |
|-----------------------------|------------------------------------------------|---------------------------------------------------------|-------------------------------------------|
| Age, mean, years            | 64.9                                           | 65.7                                                    | 66.4                                      |
| Male, %                     | 55.0                                           | 56.0                                                    | 54.8                                      |
| Diabetes, %                 | 25.2                                           | 25.3                                                    | 36.2                                      |
| Hypertension, %             | 74.8                                           | 77.5                                                    | 82.8                                      |
| Heart failure, %            | 23.3                                           | 18.9                                                    | 18.9                                      |
| Baseline LDL-C, mean, mg/dL | 103                                            | N/A                                                     | 94                                        |

LDL-C, low-density lipoprotein cholesterol; NHANES, National Health and Nutrition Examination Survey.



**eTable 5. Estimated 95% CIs for the Proportion of ASCVD Patients Receiving Add-on PCSK9 Inhibitors in the Simulation for the Base Case**

| <b>ASCVD Population Size</b> | <b>Lower Bound of 95% CI</b> | <b>Median</b> | <b>Upper Bound of 95% CI</b> |
|------------------------------|------------------------------|---------------|------------------------------|
| 50                           | 6.0%                         | 14.0%         | 24.0%                        |
| 100                          | 8.0%                         | 14.0%         | 22.0%                        |
| 500                          | 11.0%                        | 14.0%         | 17.0%                        |
| 1,000                        | 11.9%                        | 14.0%         | 16.2%                        |
| 5,000                        | 13.1%                        | 14.0%         | 15.0%                        |
| 10,000                       | 13.4%                        | 14.0%         | 14.7%                        |

The above estimates are based on a bootstrap methodology, where the entire simulation model was run repeatedly 1,000 times for a given ASCVD population size.

ASCVD, atherosclerotic cardiovascular disease; CI, confidence interval; PCSK9i, proprotein convertase subtilisin/kexin type 9 inhibitor.

**eTable 6. Distribution of LDL-C Levels Before and After Treatment Intensification  
in Base-Case Scenario A**

| Treatment                               | LDL-C Level, mg/dL* |       |       |       |       |      |
|-----------------------------------------|---------------------|-------|-------|-------|-------|------|
|                                         | <10                 | 10-25 | 25-40 | 40-55 | 55-70 | >70  |
| <b>Before Treatment Intensification</b> |                     |       |       |       |       |      |
| No statin                               | <0.1                | 0.1   | 0.5   | 1.8   | 4.2   | 40.2 |
| Statin only                             | <0.1                | 0.2   | 1.3   | 5.2   | 11.1  | 33.6 |
| Statin + ezetimibe                      | <0.1                | <0.1  | 0.1   | 0.2   | 0.5   | 0.9  |
| Statin + alirocumab                     | NA                  | NA    | NA    | NA    | NA    | NA   |
| All                                     | 0.1                 | 0.3   | 1.8   | 7.3   | 15.7  | 74.8 |
| <b>After Treatment Intensification</b>  |                     |       |       |       |       |      |
| No statin                               | NA                  | NA    | NA    | NA    | NA    | NA   |
| Statin only                             | 0.1                 | 1.9   | 8.5   | 19.7  | 37.0  | NA   |
| Statin + ezetimibe                      | <0.1                | 0.3   | 1.9   | 5.5   | 10.9  | NA   |
| Statin + alirocumab                     | 0.1                 | 3.1   | 3.7   | 3.3   | 3.1   | 0.7  |
| All                                     | 0.2                 | 5.3   | 14.1  | 28.7  | 51.0  | 0.7  |

Abbreviations: LDL-C, low-density lipoprotein cholesterol; NA, not applicable.

\*Data in the table are expressed as percentage of patients.

**eTable 7. Use of LLT With Full Treatment Intensification Across All Scenarios**

| Treatment                       | Pretreatment, % of Patients | Scenario, % of Patients* |      |      |      |      |      |      |
|---------------------------------|-----------------------------|--------------------------|------|------|------|------|------|------|
|                                 |                             | B3                       | C    | B1   | A    | D    | B2   | B4   |
| Statin only                     | 51.5                        | 78.7                     | 67.3 | 69.7 | 67.3 | 67.3 | 48.4 | 39.4 |
| Statin + ezetimibe              | 1.7                         | 15.2                     | 25.0 | 17.4 | 18.7 | 18.8 | 30.7 | 32.9 |
| Statin + alirocumab             | NA                          | 5.9                      | NA   | 11.6 | NA   | 12.6 | 19.6 | 25.4 |
| Statin + ezetimibe + alirocumab | NA                          | 0.3                      | 7.7  | 1.3  | 14.0 | 1.4  | 1.3  | 2.3  |

Abbreviation: LLT, lipid level–lowering treatment.

\*Scenarios are ordered by increasing use of proprotein convertase subtilisin/kexin type 9 inhibitor therapy, and are described in the methods section.

**eTable 8. Achieved LDL-C Levels for the Base Case Compared With Scenarios Representing Treatment With Only Alirocumab, 150 mg, or Evolocumab**

|                  | <b>Alirocumab Uptitration*</b> | <b>Alirocumab 150 mg Only<sup>†</sup></b> | <b>Alirocumab 150 mg Only (LTS)<sup>‡</sup></b> | <b>Evolocumab (FOURIER)<sup>§</sup></b> |
|------------------|--------------------------------|-------------------------------------------|-------------------------------------------------|-----------------------------------------|
| ≥70 mg/dL        | 5.4%                           | 5.4%                                      | 6.1%                                            | 9.7%                                    |
| <70 to 25 mg/dL  | 72.0%                          | 47.9%                                     | 52.2%                                           | 49.9%                                   |
| <25 to 10 mg /dL | 21.8%                          | 33.1%                                     | 31.4%                                           | 28.1%                                   |
| <10 mg/dL        | 0.8%                           | 13.6%                                     | 10.2%                                           | 12.2%                                   |

The above table is a comparison of achieved LDL-C levels in those receiving add-on PCSK9i (not achieving LDL-C <70 mg/dL with statins ± ezetimibe only) in the simulation, under scenarios explained in further detail below.

\*Patients initiated on alirocumab 75 mg, with uptitration to alirocumab 150 mg, with efficacies based on on-treatment analyses from pooled ODYSSEY data (mean percent LDL-C reduction of 48.6% and 64.4%, respectively); †All patients initiated on alirocumab 150 mg with efficacy based on on-treatment analysis from pooled ODYSSEY data (mean percent LDL-C reduction of 64.4%), ‡All patients initiated on alirocumab 150 mg with efficacy based on ODYSSEY LONG TERM Study (LTS; Robinson et al. N Engl J Med. 2015;<sup>11</sup> mean percent LDL-C reduction of 61.9%), §All patients initiated on evolocumab with efficacy based on FOURIER study (Sabatine et al. N Engl J Med. 2017;<sup>12</sup> mean percent LDL-C reduction of 59%). The distribution of efficacy was estimated from reported summary measures for placebo and achieved LDL-C in the FOURIER trial.

LDL-C, low-density lipoprotein cholesterol.

**eFigure 1. Determination of Treatment Status as of the Index Date**

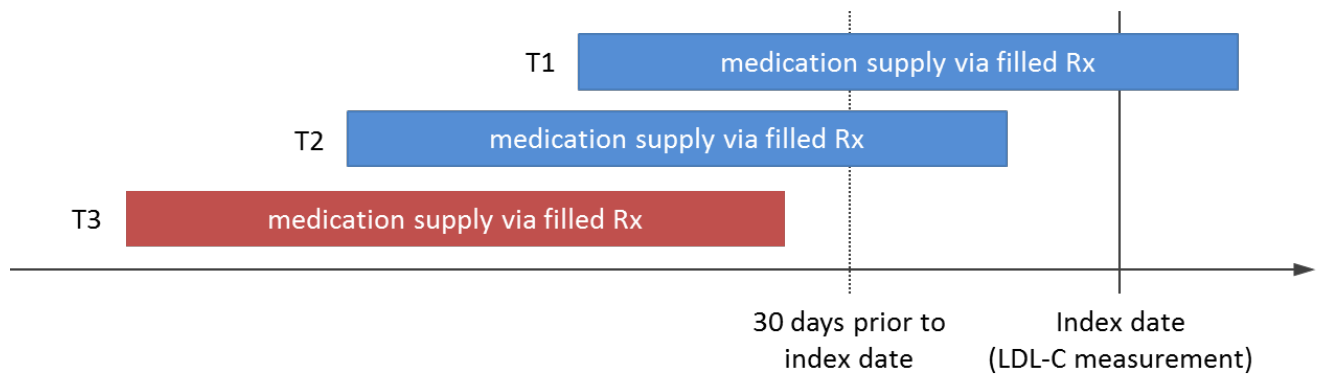

Blue bars representing Treatment Status T1 and T2 (medication supply via filled Rx on or within 30 days prior to the index date) define the patient as being treated as of the index date. The red bar representing Treatment Status T3 (medication supply via filled Rx more than 30 days prior to the index date) defines the patient as not being treated as of the index date.

LDL-C, low-density lipoprotein cholesterol; Rx, prescription

**eFigure 2. Flowchart of the Cohort Selection for the Study**

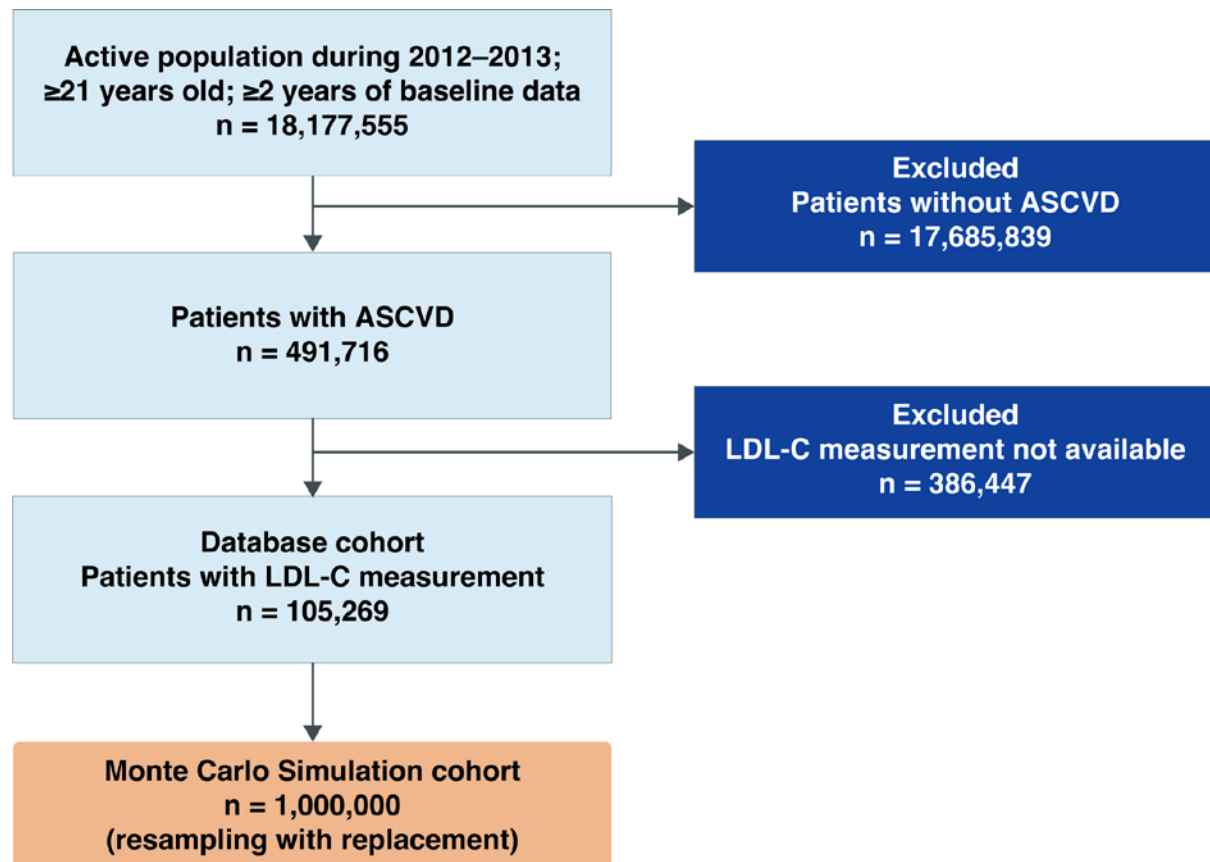

ASCVD, atherosclerotic cardiovascular disease; LDL-C, low-density lipoprotein cholesterol.

**eFigure 3. LLT Use and LDL-C Level Distribution After Treatment Intensification**  
**With an LDL-C Threshold of <55 mg/dL Compared With <70 mg/dL**

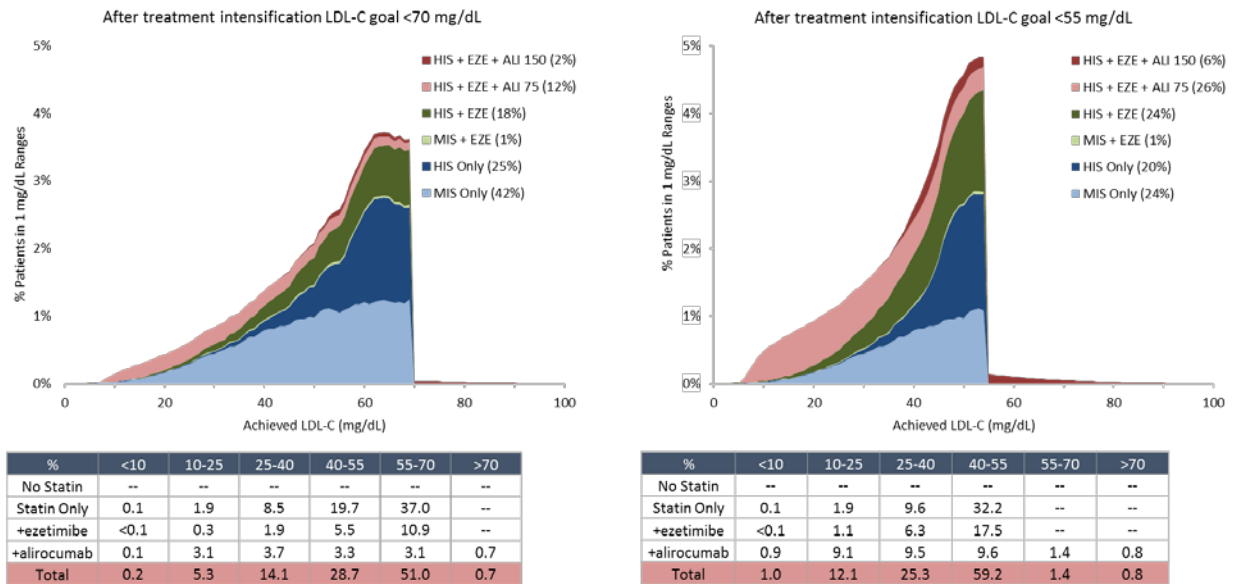

The vertical axis in above graphs represents percent patients per 1 mg/dL range.

ALI 75, alirocumab 75 mg; ALI 150, alirocumab 150 mg; EZE, ezetimibe; HIS, high-intensity statin; LDL-C, low-density lipoprotein cholesterol; LLT, lipid-lowering therapy; MIS, moderate- to low-intensity statin.

## **eMethods. Estimation of Sampling Weights for Bootstrap Sampling**

Sampling weights were utilized in the bootstrap-sampling process in order to account for quantifiable differences in the characteristics of the database cohort relative to generalizable sources and allow for findings that are more representative of the overall US population. The sampling weights represented adjustment factors based on patient demographic and clinical profiles and were derived in the following manner: the database cohort was initially divided into mutually exclusive strata based on status representing presence of coronary heart disease (CHD; including recent acute coronary syndrome and other CHD), ischemic stroke, peripheral arterial disease (PAD), diabetes mellitus (DM), dichotomous age groups (21 to 64 years versus  $\geq 65$  years), and gender. An example of strata would be a profile representing male, aged  $\geq 65$  years, with CHD and DM.

Differential weights by these mutually exclusive strata were then estimated via an optimization algorithm to minimize the difference between estimated totals for aggregate categories (not mutually exclusive) representing CHD, ischemic stroke, PAD, DM, age groups, and gender, and their reported prevalence in the USA based on American Heart Association Heart Disease and Stroke Statistics<sup>1</sup> and the US Census Bureau<sup>2</sup>. Estimation of sampling weights via optimization methodology was conducted using Excel Solver. The methodology helped account for differential scaling by patient profiles and eliminated double counting due to overlap between conditions. Validation checks were then conducted by applying the estimated sampling weights at a patient level to the database cohort, multiplying by the ratio of US population to database N, summing across aggregate profiles (not mutually exclusive; e.g., CHD, aged  $\geq 65$  years, etc.), and comparing them back with the presumed inputs representing published data.



## References

1. Mozaffarian D, Benjamin EJ, Go AS, et al. AHA statistical update. *Circulation* 2016;133:e38-e360.
2. Annual Estimates of the Resident Population for Selected Age Groups by Sex for the United States, States, Counties, and Puerto Rico Commonwealth and Municipios: April 1, 2010 to July 1, 2013. U.S. Census Bureau. June 2014.
3. Nicholls SJ, Brandrup-Wognsen G, Palmer M, Barter PJ. Meta-analysis of comparative efficacy of increasing dose of Atorvastatin versus Rosuvastatin versus Simvastatin on lowering levels of atherogenic lipids (from VOYAGER). *Am J Cardiol* 2010;105:69-76.
4. Ward S, Lloyd Jones M, Pandor A, et al. A systematic review and economic evaluation of statins for the prevention of coronary events. *Health Technol Assess* 2007;11:1-160.
5. Law R, Wald N, Rudnicka AR. Quantifying effect of statins on low density lipoprotein cholesterol, ischaemic heart disease, and stroke: systematic review and meta-analysis. *BMJ* 2003;326:1423.
6. Bradford RH, Shear CL, Chremos AN, et al. Expanded Clinical Evaluation of Lovastatin (EXCEL) study results. I. Efficacy in modifying plasma lipoproteins and adverse event profile in 8245 patients with moderate hypercholesterolemia. *Arch Intern Med* 1991;151:43-9.
7. Cannon CP, Blazing MA, Giugliano RP, et al. Ezetimibe added to statin therapy after acute coronary syndromes. *N Engl J Med* 2015;372:2387-97.
8. Descamps O, Tomassini JE, Lin J, et al. Variability of the LDL-C lowering response to ezetimibe and ezetimibe + statin therapy in hypercholesterolemic patients. *Atherosclerosis* 2015;240:482-9.
9. Wong N, Young D, Zhao Y, et al. Prevalence of the American College of Cardiology/American Heart Association statin eligibility groups, statin use, and low-density lipoprotein cholesterol control in US adults using the National Health and Nutrition Examination Survey 2011-2012. *J Clin Lipidol* 2016; 10:1109-18.
10. Maddox TM, Borden WB, Tang F, et al. Implications of the 2013 ACC/AHA cholesterol guidelines for adults in contemporary cardiovascular practice: insights from the NCDR PINNACLE registry. *J Am Coll Cardiol* 2014;64:2183-92.
11. Robinson JG, Farnier M, Krempf M, et al. Efficacy and safety of alirocumab in reducing lipids and cardiovascular events. *N Engl J Med* 2015;372:1489-99.
12. Sabatine MS, Giugliano RP, Keech AC, et al. Evolocumab and Clinical Outcomes in Patients with Cardiovascular Disease. *N Engl J Med* 2017;376:1713-22.
